# Supplementary material
Source: HighWire-hosted journal article supplement (doi:10.1101/rna.080790.125)
Supplement: Supplemental_Table_S1.xlsx [file Supplemental_Table_S1.xlsx]

## Sheet: Supplemental Table S1
	Supplemental Table S1. Comparison of subtelomeric TERRA promoters in the T2T-CHM13 and GRCh38.p14 reference genomes.
	Promoter coordinates
	Chromosome	Start	End	Sequence organization T2T-CHM13v2.0	Sequence organization GRCh38.p14	Length 61 repeat (bp) T2T-CHM13v2.0 | GRCh38.p14	Length 29 repeat (bp) T2T-CHM13v2.0 | GRCh38.p14	Length 37 repeat (bp) T2T-CHM13v2.0 | GRCh38.p14	Subtelomeric promoter identification
	1p arm	2710	4011	E	C	592 | 301	503 | 322	/ | 160	Nergadze et al., 2009
	1q arm	248382818	248384120	A	A	384 | 384	144 | 99	233 | 233	Present work
	2p arm	3631	5321	A	A	470 | 470	810 | 462	139 | 139	Nergadze et al., 2009
	2q arm	242692644	242694126	C	A	384 | 384	752 | 235	99 | 240	Present work
	3p arm	2646	3414	G	G	/ | /	769 | 786	/ | /	Present work
	3q arm	201100208	201101331	C	NA	301 | /	337 | /	150 | /	Nergadze et al., 2009
	4p arm	3270	5566	A	A	688 | 688	1084 | 1028	175 | 175	Nergadze et al., 2009
	4q arm	193571228	193572626	A	A	384 | 384	240 | 240	233 | 233	Present work
	5p arm	2297	3817	B	B	128 | 128	560 | 482	250 | 250	Nergadze et al., 2009
	5q arm	182042164	182043881	A	A	384 | 384	559 | 652	233 | 233	Present work
	6p arm	2898	3890	A	NA	635 | /	25 | /	87 | /	Present work
	6q arm	172121141	172123849	B	NA	598 | /	1019 | /	233 | /	Present work
	7p arm	3418	5135	A	Not present	384 | /	559 | /	233 | /	Present work
	7q arm	160563741	160565207	D	D	/ | /	868 | 28	191 | 191	Present work
	8p arm	2517	4041	A	NA	627 | /	53 | /	233 | /	Nergadze et al., 2009
	8q arm	Not present			Not present	/ | /	/ | /	/ | /	/
	9p arm	3692	5375	A	A	301 | 301	658 | 78	221 | 221	Nergadze et al., 2009
	9q arm	150612695	150614272	A	NA	384 | /	521 | /	240 | /	Present work
	10p arm	2638	3803	G	F	/ | /	1165 | 63	/ | 191	Present work
	10q arm	134753448	134754934	A	A	383 | 384	327 | 95	233 | 233	Brown et al., 1990
	11p arm	1989	3049	C	NA	287 | /	252 | /	148 | /	Nergadze et al., 2009
	11q arm	135123934	135125178	A	A	356 | 356	710 | 217	80 | 80	Present work
	12p arm	3103	4600	A	C	301 | 301	455 | 222	221 | 158	Present work
	12q arm	133321552	133322210	D	D	/ | /	59 | 59	191 | 191	Present work
	13p arm	Not present			NA	/ | /	/ | /	/ | /	/
	13q arm	113561683	113563182	A	A	383 | 384	356 | 153	233 | 233	Present work
	14p arm	Not present			NA	/ | /	/ | /	/ | /	/
	14q arm	101158454	101159839	C	NA	282 | 282	822 | /	20 | /	Present work
	15p arm	3265	5612	A	NA	681 | /	1302 | /	175 | /	Present work
	15q arm	99748802	99750264	A	A	301 | 301	288 | 236	233 | 233	Nergadze et al., 2009
	16p arm	2330	4068	A	A	301 | 301	716 | 72	221 | 221	Nergadze et al., 2009
	16q arm	96325974	96327691	A	NA	384 | /	559 | /	233 | /	Present work
	17p arm	Not present			NA	/ | /	/ | /	/ | /	/
	17q arm	84272275	84273878	A	NA	384 | /	445 | /	233 | /	Present work
	18p arm	2017	2927	F	F	/ | /	615 | 220	191 | 191	Present work
	18q arm	80538600	80539048	C	C	117 | 117	26 | 183	42 | 26	Present work
	19p arm	2285	4047	A	NA	301 | /	589 | /	211 | /	Nergadze et al., 2009
	19q arm	61703441	61704425	C	C	345 | 345	298 | 342	99 | 194	Present work
	20p arm	2729	4272	A	NA	384 | /	385 | /	233 | /	Present work
	20q arm	66205692	66207101	A	NA	301 | /	391 | /	221 | /	Present work
	21p arm	Not present			NA	/ | /	/ | /	/ | /	/
	21q arm	45084636	45086111	A	A	384 | 384	293 | 501	233 | 233	Nergadze et al., 2009
	22p arm	Not present			NA	/ | /	/ | /	/ | /	/
	22q arm	51320445	51321954	A	A	384 | 374	327 | 66	233 | 233	Present work
	Xp arm	Not present			NA	/ | /	/ | /	/ | /	/
	Xq arm	154255334	154256622	A	A	301 | 301	261 | 261	233 | 233	Nergadze et al., 2009
		Different in comparison to CHM13
	NA	Not assembled
