# Supplementary material
Source: HighWire-hosted journal article supplement (doi:10.1101/rna.080790.125)
Supplement: Supplemental_Table_S2.xlsx [file Supplemental_Table_S2.xlsx]

## Sheet: Supplemental Table S2
	Supplemental Table S2. Interstitial Telomeric Sequences (ITSs) in the T2T-CHM13 reference genome.
	ITS number	Chromosome number	Start	End	Length (bp)	Mismatch/ Repeat	TERRA-like promoter (locus ID in Supplemental Table S3)
	1	1	9530	9549	20	0.3	No
	2	1	4682200	4682230	31	0.39	No
	3	1	7267009	7267027	19	0.32	No
	4	1	10983084	10983162	79	0.68	No
	5	1	12168907	12168947	41	0.59	No
	6	1	18074555	18074682	128	0.28	No
	7	1	19779903	19779919	17	0	No
	8	1	25353482	25353502	21	0	No
	9	1	28165944	28165963	20	0	No
	10	1	30110807	30110828	22	0.27	No
	11	1	31885375	31885402	28	0.64	No
	12	1	41151352	41151395	44	0.27	No
	13	1	41369832	41369853	22	0.55	No
	14	1	56650482	56650524	43	0.84	No
	15	1	73198402	73198422	21	0	No
	16	1	77967529	77967564	36	0	No
	17	1	79208718	79208741	24	0.25	No
	18	1	97826610	97826646	37	0.81	No
	19	1	110114301	110114326	26	0.69	No
	20	1	127776463	127776760	298	1.23	Yes (1.1)
	21	1	142497453	142497671	219	1.26	Yes (1.3)
	22	1	143351945	143352163	219	1.26	Yes (1.5)
	23	1	143814923	143815141	219	1.26	Yes (1.6)
	24	1	144626694	144626712	19	0.32	No
	25	1	146724427	146724445	19	0.32	No
	26	1	169324943	169324963	21	0.57	No
	27	1	177863682	177863703	22	0.55	No
	28	1	180091873	180091901	29	0.83	No
	29	1	182034692	182034717	26	0.46	No
	30	1	192570755	192570779	25	0.72	No
	31	1	202383467	202383487	21	0.57	No
	32	1	225653732	225653779	48	0.5	No
	33	1	240486477	240486494	18	0	No
	34	2	6848782	6848797	16	0	No
	35	2	7375579	7375604	26	0.69	No
	36	2	10269515	10269536	22	0.55	No
	37	2	11038159	11038190	32	0.56	No
	38	2	11725224	11725240	17	0	No
	39	2	22202742	22202769	28	0.64	No
	40	2	23087275	23087295	21	0.57	No
	41	2	29419960	29419978	19	0	No
	42	2	49836402	49836435	34	0.71	No
	43	2	52943874	52943893	20	0	No
	44	2	59580559	59580574	16	0	No
	45	2	70469719	70469740	22	0.27	No
	46	2	75081344	75081385	42	0.57	No
	47	2	75538468	75538493	26	0.46	No
	48	2	78217843	78217863	21	0	No
	49	2	86917301	86917328	28	0.21	No
	50	2	89437625	89437903	279	1.12	Yes (2.2)
	51	2	89592618	89592836	219	1.26	Yes (2.3)
	52	2	90148523	90148741	219	1.23	Yes (2.6)
	53	2	90303537	90303815	279	1.14	Yes (2.7)
	54	2	91850348	91850566	219	1.21	Yes (2.10)
	55	2	92185037	92185330	294	1.12	Yes (2.11)
	56	2	102690949	102690969	21	0.57	No
	57	2	114027333	114028210	878	0.72	Yes (2.14 - 2.15)
	58	2	114044466	114044485	20	0.3	No
	59	2	114049247	114049494	248	0.82	No
	60	2	121904042	121904072	31	0.77	No
	61	2	122594745	122594799	55	0.87	No
	62	2	124568256	124568279	24	0.75	No
	63	2	129531049	129531067	19	0.32	No
	64	2	132238229	132238254	26	0.69	No
	65	2	132238885	132239143	259	1.11	Yes (2.16)
	66	2	132248365	132248634	270	1.11	Yes (2.17)
	67	2	132788125	132788395	271	1.02	Yes (2.18)
	68	2	145206918	145206939	22	0.27	No
	69	2	181765935	181766001	67	0	No
	70	2	209448712	209448731	20	0.3	No
	71	2	219248682	219248701	20	0	No
	72	2	220188378	220188414	37	0.65	No
	73	2	222548470	222548560	91	0.33	No
	74	2	228317923	228317961	39	0.77	No
	75	2	229597816	229597844	29	0.62	No
	76	2	231729967	231729996	30	0.6	No
	77	2	232889805	232889841	37	0.49	No
	78	2	232941955	232941983	29	0.41	No
	79	2	234746889	234746908	20	0	No
	80	2	234796696	234796718	23	0.78	No
	81	2	239980101	239980126	26	0.69	No
	82	2	240714327	240714361	35	0	No
	83	2	241107588	241108443	856	1.6	No
	84	2	242679165	242679186	22	0.55	No
	85	3	31475826	31475844	19	0	No
	86	3	35965728	35965747	20	0	No
	87	3	44358281	44358304	24	0.75	No
	88	3	48374302	48374320	19	0.32	No
	89	3	50800703	50800758	56	1.07	No
	90	3	57065886	57065907	22	0.27	No
	91	3	59462079	59462103	25	0	No
	92	3	72667420	72667439	20	0.3	No
	93	3	95749198	95749500	303	1.19	Yes (3.1)
	94	3	109504935	109504954	20	0.3	No
	95	3	116123754	116123777	24	0.75	No
	96	3	121626233	121626250	18	0	No
	97	3	126155381	126155406	26	0.23	No
	98	3	126970098	126970119	22	1.64	No
	99	3	137191727	137191746	20	0.9	No
	100	3	137422927	137422963	37	0.49	No
	101	3	147375259	147375274	16	0	No
	102	3	162468838	162468878	41	0.15	No
	103	3	184626796	184626835	40	0.9	No
	104	3	200903916	200905755	1840	0.83	No
	105	4	22554	22751	198	1.21	No
	106	4	704583	705050	468	1.03	No
	107	4	6398388	6398426	39	0.46	No
	108	4	6630876	6630897	22	0.55	No
	109	4	8327260	8327309	50	0.6	No
	110	4	14209533	14209553	21	0.57	No
	111	4	29866919	29866934	16	0	No
	112	4	47171881	47171911	31	0.39	No
	113	4	49233322	49233612	291	1.22	Yes (4.1)
	114	4	49294724	49295014	291	1.22	Yes (4.2)
	115	4	60579147	60579168	22	0.55	No
	116	4	72523369	72523389	21	0.57	No
	117	4	87426910	87426931	22	0.55	No
	118	4	88677414	88677430	17	0	No
	119	4	104371160	104371176	17	0	No
	120	4	110095532	110095555	24	0.25	No
	121	4	120784464	120784480	17	0	No
	122	4	193550045	193550397	353	0.8	No
	123	4	193555463	193555482	20	0.3	No
	124	5	40107	40374	268	1.28	No
	125	5	40644	41260	617	1.28	No
	126	5	1059775	1059955	181	0.27	No
	127	5	2100698	2100892	195	0.77	No
	128	5	2914364	2914425	62	0.97	No
	129	5	16287408	16287464	57	0.84	No
	130	5	17988924	17988954	31	0.58	No
	131	5	27053796	27053816	21	0.57	No
	132	5	40985345	40985373	29	0	No
	133	5	68253724	68253742	19	0.32	No
	134	5	68364963	68364993	31	0.58	No
	135	5	82296570	82296592	23	0.52	No
	136	5	84004891	84004931	41	0.29	No
	137	5	89813956	89813996	41	0.44	No
	138	5	104592534	104592553	20	0	No
	139	5	113022370	113022387	18	0	No
	140	5	120367604	120367619	16	0	No
	141	5	152378620	152378652	33	0.55	No
	142	5	157553867	157553885	19	0.32	No
	143	5	167475704	167475729	26	0.23	No
	144	5	169448883	169448906	24	0.25	No
	145	5	173322115	173322135	21	0.29	No
	146	5	182028951	182028970	20	0.3	No
	147	6	976494	976537	44	0.27	No
	148	6	2067724	2067743	20	0.3	No
	149	6	2499114	2499135	22	0.27	No
	150	6	6795400	6795438	39	0.77	No
	151	6	7787116	7787136	21	0	No
	152	6	11935279	11935312	34	0.53	No
	153	6	38769385	38769465	81	0.37	No
	154	6	55037904	55037929	26	0.69	No
	155	6	63230632	63230658	27	0.44	No
	156	6	77898553	77898569	17	0	No
	157	6	83143346	83143361	16	0	No
	158	6	113286038	113286059	22	0.27	No
	159	6	114984295	114984315	21	0.29	No
	160	6	116935041	116935070	30	0.6	No
	161	6	118184607	118184626	20	0.3	No
	162	6	135408752	135408782	31	0.77	No
	163	6	136742634	136742678	45	1.2	No
	164	6	158225176	158225196	21	0.29	No
	165	6	165507550	165507572	23	0.52	No
	166	6	167577299	167577321	23	0.26	No
	167	6	169109015	169109037	23	0.26	No
	168	6	169150610	169150642	33	0.36	No
	169	6	171548712	171548731	20	0	No
	170	6	172115770	172115791	22	0.55	No
	171	7	18504	18525	22	0.55	No
	172	7	113892	114667	776	0.79	No
	173	7	274521	274550	30	0	No
	174	7	1167839	1167931	93	1.42	No
	175	7	1288212	1288252	41	0.44	No
	176	7	1868825	1869032	208	1.3	No
	177	7	31498863	31498892	30	0.8	No
	178	7	41140241	41140262	22	0	No
	179	7	41282019	41282045	27	0.89	No
	180	7	43047059	43047075	17	0	No
	181	7	44255932	44255965	34	0.35	No
	182	7	67294074	67294096	23	0.52	No
	183	7	68572585	68572711	127	1.37	No
	184	7	73638481	73638517	37	0.97	No
	185	7	86857263	86857320	58	0.72	No
	186	7	113457234	113457253	20	0	No
	187	7	154071116	154071188	73	0.16	No
	188	7	156953285	156953334	50	0.6	No
	189	7	157373329	157373356	28	0.21	No
	190	7	160523216	160523381	166	1.16	No
	191	8	16217	16402	186	1.74	No
	192	8	17214	17391	178	0.67	No
	193	8	360158	360192	35	0.86	No
	194	8	27266408	27266436	29	0.83	No
	195	8	35883954	35883992	39	0.15	No
	196	8	37511889	37511916	28	0.21	No
	197	8	53413764	53413780	17	0	No
	198	8	66327368	66327398	31	0.39	No
	199	8	76418952	76418980	29	0.41	No
	200	8	85293068	85293092	25	0.72	No
	201	8	97924326	97924365	40	0.9	No
	202	8	103052628	103052652	25	0.72	No
	203	8	113300314	113300342	29	0.62	No
	204	8	113834773	113834798	26	0.23	No
	205	8	115973232	115973260	29	0.62	No
	206	8	123078121	123078136	16	0	No
	207	8	125937604	125937644	41	0.73	No
	208	8	130209965	130209984	20	0.3	No
	209	8	143422594	143422616	23	0.52	No
	210	8	144331826	144331861	36	0.5	No
	211	9	2827844	2827880	37	0	No
	212	9	13967693	13967717	25	0.24	No
	213	9	30494589	30494611	23	0.26	No
	214	9	34735284	34735308	25	0.48	No
	215	9	34925808	34925830	23	0.52	No
	216	9	38405954	38405973	20	0.3	No
	217	9	40801839	40802084	246	1.15	Yes (9.3)
	218	9	42019874	42020132	259	1.09	Yes (9.5)
	219	9	44188465	44188727	263	1.21	Yes (9.7)
	220	9	44211087	44211335	249	1.2	Yes (9.8)
	221	9	47778959	47779217	259	1.18	Yes (9.10)
	222	9	48745171	48745205	35	0.51	No
	223	9	76971956	76972227	272	1.24	Yes (9.12)
	224	9	80193472	80193717	246	1.1	Yes (9.16)
	225	9	80342592	80342837	246	1.08	Yes (9.17)
	226	9	81433154	81433231	78	0.38	No
	227	9	119539493	119539544	52	1.27	No
	228	9	122782972	122782992	21	0.57	No
	229	9	133702224	133702241	18	0	No
	230	9	134988984	134989003	20	0.3	No
	231	9	140361357	140361408	52	0.12	No
	232	9	142370087	142370188	102	0.82	No
	233	9	145747271	145747289	19	0	No
	234	9	146424574	146424607	34	0.18	No
	235	9	149494104	149494119	16	0	No
	236	9	150380447	150380471	25	0.72	No
	237	9	150394480	150394619	140	0.77	No
	238	9	150425122	150425458	337	0.98	No
	239	9	150499557	150500303	747	0.83	No
	240	9	150599398	150599419	22	0.55	No
	241	10	57229	57561	333	0.99	No
	242	10	2951871	2951889	19	0	No
	243	10	3537953	3537984	32	0.56	No
	244	10	3947965	3948154	190	0.76	No
	245	10	4072970	4073128	159	1.06	No
	246	10	4617326	4617346	21	0.57	No
	247	10	8469778	8469896	119	0.55	No
	248	10	16322714	16322736	23	0.52	No
	249	10	25426160	25426183	24	0.25	No
	250	10	26568834	26568857	24	0.5	No
	251	10	28338091	28338107	17	0	No
	252	10	38675472	38675758	287	1.07	Yes (10.1)
	253	10	44257652	44257672	21	0.29	No
	254	10	46977607	46977626	20	0.3	No
	255	10	47152233	47152258	26	0.23	No
	256	10	47181567	47181736	170	0.67	No
	257	10	47182152	47182182	31	0.19	No
	258	10	48296377	48296515	139	0.52	No
	259	10	51914463	51914484	22	0.27	No
	260	10	53593167	53593189	23	0.52	No
	261	10	77142201	77142225	25	0.24	No
	262	10	79143404	79143430	27	0.44	No
	263	10	79744490	79744541	52	0.81	No
	264	10	80412362	80412388	27	0.44	No
	265	10	81086067	81086103	37	0.65	No
	266	10	118065291	118065311	21	0.29	No
	267	10	125943561	125943582	22	0.27	No
	268	10	134517881	134518926	1046	1.28	No
	269	10	134732968	134733320	353	0.78	No
	270	10	134738394	134738413	20	0.3	No
	271	11	201435	202799	1365	0.63	No
	272	11	232481	232703	223	1.05	No
	273	11	1931630	1931661	32	0.38	No
	274	11	2211803	2211831	29	0.41	No
	275	11	6931606	6931626	21	0.57	No
	276	11	9116543	9116558	16	0	No
	277	11	10749997	10750029	33	0	No
	278	11	18736506	18736522	17	0	No
	279	11	25665966	25665989	24	0	No
	280	11	33270751	33270771	21	0.57	No
	281	11	55651275	55651291	17	0	No
	282	11	57325753	57325779	27	0.89	No
	283	11	57929979	57930084	106	1.13	No
	284	11	63017480	63017535	56	0.32	No
	285	11	69333628	69333655	28	0.21	No
	286	11	70260628	70260643	16	0	No
	287	11	80821567	80821716	150	0.76	No
	288	11	84992427	84992449	23	0.52	No
	289	11	87867737	87867760	24	0	No
	290	11	107494225	107494243	19	0.32	No
	291	11	114286004	114286141	138	0.39	No
	292	11	124562260	124562296	37	0.32	No
	293	11	129739224	129739255	32	0.19	No
	294	12	101079	101113	35	0	No
	295	12	15225319	15225342	24	0.75	No
	296	12	15880817	15880842	26	0.92	No
	297	12	22119098	22119132	35	0.17	No
	298	12	26221772	26221787	16	0	No
	299	12	70599108	70599124	17	0	No
	300	12	77654799	77654821	23	0.52	No
	301	12	88036666	88036688	23	0	No
	302	12	98288151	98288178	28	0.43	No
	303	12	106541453	106541499	47	1.02	No
	304	12	107986277	107986300	24	0.75	No
	305	12	110121902	110121919	18	0.33	No
	306	12	112511444	112511491	48	1.38	No
	307	12	121187418	121187475	58	0.83	No
	308	12	124269590	124269786	197	0.79	No
	309	12	124915748	124915768	21	0.57	No
	310	12	125546381	125546399	19	0.32	No
	311	12	126573768	126573841	74	0.73	No
	312	12	127688017	127688037	21	0.29	No
	313	12	132504959	132504981	23	0.52	No
	314	12	133298420	133298734	315	1.39	No
	315	13	9405420	9405724	305	1.24	Yes (13.1)
	316	13	10451446	10451736	291	1.22	Yes (13.2)
	317	13	12799788	12800051	264	1.07	Yes (13.4)
	318	13	26082488	26082507	20	0.3	No
	319	13	34674031	34674060	30	0.8	No
	320	13	38976911	38976927	17	0	No
	321	13	80937494	80937524	31	0.58	No
	322	13	89908205	89908250	46	0.91	No
	323	13	93495973	93495999	27	0	No
	324	13	94724664	94724684	21	0.29	No
	325	13	107734891	107734909	19	0.32	No
	326	13	109694733	109694767	35	0.69	No
	327	13	110903701	110903741	41	0.59	No
	328	13	111243031	111243228	198	0.94	No
	329	13	112154164	112154289	126	1.1	No
	330	13	113358259	113358277	19	0.32	No
	331	13	113415113	113415133	21	0	No
	332	13	113422683	113422713	31	0.19	No
	333	14	1658456	1658752	297	1.17	Yes (14.1)
	334	14	2876657	2876961	305	1.24	Yes (14.2)
	335	14	4020351	4020641	291	1.26	Yes (14.3)
	336	14	5824518	5824828	311	1.14	Yes (14.4)
	337	14	6601781	6602046	266	1.08	Yes (14.5)
	338	14	9935744	9935762	19	0.32	No
	339	14	13076135	13076464	330	1.09	No
	340	14	13085667	13085867	201	1.1	Yes (14.8)
	341	14	43304666	43304690	25	0.48	No
	342	14	64282373	64282389	17	0	No
	343	14	72637640	72637667	28	0.64	No
	344	14	91165765	91165780	16	0	No
	345	14	93608609	93608641	33	0.36	No
	346	14	94824521	94824593	73	0.9	No
	347	14	98829660	98829681	22	0.55	No
	348	14	98844653	98844675	23	0.26	No
	349	14	101156320	101156341	22	0.55	No
	350	15	22606	22797	192	1.72	No
	351	15	170430	170712	283	1.27	Yes (15.1)
	352	15	1869832	1870135	304	1.16	Yes (15.2)
	353	15	4764893	4765197	305	1.24	Yes (15.3)
	354	15	16572291	16572555	265	1.06	Yes (15.4)
	355	15	18097305	18097326	22	0.27	No
	356	15	19137734	19138312	579	1.19	No
	357	15	19455884	19455905	22	0.27	No
	358	15	26700911	26700930	20	0.3	No
	359	15	39756969	39757008	40	0	No
	360	15	63972578	63972595	18	0	No
	361	15	68822909	68822933	25	0.24	No
	362	15	78327068	78327098	31	0	No
	363	15	81759271	81759291	21	0.29	No
	364	16	12452	12829	378	1.03	No
	365	16	68786	68801	16	0	No
	366	16	744735	744756	22	0.55	No
	367	16	10021194	10021210	17	0	No
	368	16	10287821	10287851	31	0.19	No
	369	16	13881197	13881230	34	0.88	No
	370	16	14729296	14729312	17	0	No
	371	16	26036534	26036597	64	0.38	No
	372	16	28731219	28731235	17	0	No
	373	16	28945239	28945255	17	0	No
	374	16	29059239	29059255	17	0	No
	375	16	29339727	29339743	17	0	No
	376	16	29533670	29533695	26	0.69	No
	377	16	29759527	29759543	17	0	No
	378	16	30501638	30501654	17	0	No
	379	16	30603605	30603621	17	0	No
	380	16	32878639	32878925	287	1.13	Yes (16.1)
	381	16	34596385	34596665	281	1.13	Yes (16.4)
	382	16	62521415	62521435	21	0.57	No
	383	16	71036693	71036738	46	0.52	No
	384	16	81380980	81381020	41	0	No
	385	16	82173235	82173289	55	0.65	No
	386	16	82197974	82198004	31	0.39	No
	387	16	87986943	87987029	87	0.83	No
	388	16	93595960	93596549	590	1.08	No
	389	16	94292682	94292707	26	0.69	No
	390	16	94624978	94624993	16	0	No
	391	16	94950581	94950618	38	0.32	No
	392	16	96209774	96210513	740	0.8	No
	393	16	96312743	96312762	20	0.3	No
	394	17	41785	41978	194	1.14	No
	395	17	47125	47193	69	0.87	No
	396	17	11318738	11318760	23	0.26	No
	397	17	12380049	12380072	24	0.5	No
	398	17	31249446	31249464	19	0	No
	399	17	32006338	32006358	21	0.57	No
	400	17	37518642	37518664	23	0.52	No
	401	17	40560695	40560719	25	0.72	No
	402	17	48566425	48566450	26	0.46	No
	403	17	49344282	49344369	88	1.02	No
	404	17	79366708	79366837	130	1.38	No
	405	17	80960483	80960503	21	0	No
	406	17	84256166	84256187	22	0.55	No
	407	17	84256320	84256339	20	0.6	No
	408	18	55417	56092	676	0.45	Yes (18.1)
	409	18	109434	110091	658	0.47	Yes (18.2)
	410	18	163479	164129	651	0.48	Yes (18.3)
	411	18	217401	217986	586	0.85	No
	412	18	248304	248481	178	0.78	No
	413	18	252542	252583	42	0.29	No
	414	18	254032	254053	22	0.55	No
	415	18	258983	259460	478	0.54	No
	416	18	15039806	15040082	277	1.13	Yes (18.5)
	417	18	15145918	15146213	296	1.14	Yes (18.6)
	418	18	64180619	64180643	25	0.24	No
	419	18	68377701	68377723	23	0.52	No
	420	18	76621036	76621348	313	1.34	No
	421	18	77339501	77339523	23	0.52	No
	422	18	77984747	77984767	21	0	No
	423	18	80534730	80535232	503	0.91	No
	424	19	196785	197254	470	0.77	Yes (19.1)
	425	19	209296	209315	20	0.3	No
	426	19	2319074	2319158	85	0.99	No
	427	19	3128871	3128892	22	0	No
	428	19	7659057	7659078	22	0.27	No
	429	19	7868325	7868348	24	0	No
	430	19	16789820	16789865	46	0.78	No
	431	19	17690057	17690086	30	1	No
	432	19	22144841	22144878	38	0.79	No
	433	19	35600513	35600535	23	0.26	No
	434	19	40440253	40440279	27	0.22	No
	435	19	41244270	41244285	16	0	No
	436	19	55812058	55812082	25	0.72	No
	437	19	60925788	60925807	20	0.3	No
	438	19	60986337	60986362	26	0.23	No
	439	19	61678613	61678637	25	0.48	No
	440	19	61684074	61684222	149	0.52	No
	441	19	61688970	61688989	20	0.3	No
	442	20	17700	17721	22	0.55	No
	443	20	70771	71192	422	0.8	Yes (20.1)
	444	20	3171414	3171440	27	0.67	No
	445	20	10234396	10234429	34	0.18	No
	446	20	17416768	17416787	20	0	No
	447	20	19789320	19789345	26	0.46	No
	448	20	30055828	30056098	271	1	Yes (20.2)
	449	20	30318763	30319020	258	0.91	Yes (20.3)
	450	20	36186607	36186630	24	0	No
	451	20	47049127	47049339	213	0.82	No
	452	20	51908145	51908162	18	0	No
	453	20	65959081	65959107	27	0.44	No
	454	20	66098157	66098177	21	0.57	No
	455	20	66107263	66108099	837	0.71	Yes (20.4)
	456	21	19546	19737	192	1.69	No
	457	21	232656	232935	280	1.22	Yes (21.1)
	458	21	2338356	2338659	304	1.2	Yes (21.2)
	459	21	5668125	5668429	305	1.18	Yes (21.3)
	460	21	6550484	6550751	268	1.21	Yes (21.4)
	461	21	7621870	7622180	311	1.18	Yes (21.5)
	462	21	9813383	9813633	251	1.08	Yes (21.7)
	463	21	11703856	11704151	296	1.16	Yes (21.8)
	464	21	12898218	12898240	23	0	No
	465	21	20128727	20128761	35	1.03	No
	466	21	33095424	33095501	78	0.46	No
	467	21	36219331	36219361	31	0.19	No
	468	21	36450530	36450548	19	0	No
	469	21	40840751	40840768	18	0	No
	470	21	42792397	42792471	75	0.64	No
	471	21	42821186	42821438	253	1.3	No
	472	21	45069634	45069653	20	0.3	No
	473	22	21111	21302	192	1.69	No
	474	22	230863	231153	291	1.26	Yes (22.1)
	475	22	3840067	3840370	304	1.2	Yes (22.2)
	476	22	5776474	5776778	305	1.16	Yes (22.3)
	477	22	7555466	7555756	291	1.22	Yes (22.4)
	478	22	9808082	9808384	303	1.21	Yes (22.5)
	479	22	10654631	10654941	311	1.18	Yes (22.6)
	480	22	12633359	12633377	19	0.32	No
	481	22	16073811	16074147	337	1.09	No
	482	22	16083350	16083550	201	1.1	Yes (22.8)
	483	22	17078848	17079146	299	1.16	Yes (22.9)
	484	22	17079717	17079745	29	0.83	No
	485	22	26708608	26708630	23	0.26	No
	486	22	31580791	31580812	22	0	No
	487	22	43346737	43346767	31	0	No
	488	22	44130395	44130410	16	0	No
	489	22	45110256	45110317	62	0.48	No
	490	22	49776674	49776977	304	0.97	No
	491	22	50708623	50708641	19	0	No
	492	22	51299629	51299887	259	0.79	No
	493	22	51304662	51304681	20	0.3	No
	494	X	4584	4606	23	0.26	No
	495	X	8349	8371	23	0.26	No
	496	X	2011089	2011111	23	0.52	No
	497	X	2987451	2987472	22	0	No
	498	X	2989574	2989630	57	0.63	No
	499	X	5008060	5008080	21	0.29	No
	500	X	5663278	5663311	34	0.35	No
	501	X	6418928	6418976	49	0.98	No
	502	X	23982288	23982607	320	1.48	No
	503	X	37766256	37766271	16	0	No
	504	X	47901531	47901552	22	0.27	No
	505	X	50277193	50277316	124	1.26	No
	506	X	65956085	65956113	29	0.41	No
	507	X	72982198	72982334	137	1.49	No
	508	X	82009615	82009634	20	0	No
	509	X	85672288	85672308	21	0.57	No
	510	X	89481180	89481200	21	0.29	No
	511	X	96593273	96593294	22	0.27	No
	512	X	111463338	111463409	72	1.17	No
	513	X	135940624	135940647	24	0.5	No
	514	X	136062042	136062057	16	0	No
	515	X	146270815	146270833	19	0	No
	516	X	149730139	149730158	20	0.6	No
	517	X	153601459	153601493	35	0.34	No
	518	X	153715337	153715371	35	0.17	No
	519	X	154179944	154179988	45	0.93	No
	520	X	154208438	154208513	76	0.87	No
	521	X	154208952	154209015	64	1.03	No
	522	X	154247849	154248207	359	1.02	No
