# Supplementary material
Source: HighWire-hosted journal article supplement (doi:10.1101/rna.080790.125)
Supplement: Supplemental_Table_S3.xlsx [file Supplemental_Table_S3.xlsx]

## Sheet: Supplemental Table S3
	Supplemental Table S3. Comparison of intrachromosomal TERRA promoters in the T2T-CHM13 and GRCh38.p14 reference genomes.
		T2T-CHM13v2.0 Promoter coordinates				GRCh38.p14 Promoter coordinates
	Locus identification (Chr number.locus name)	Start	End	ITS	Distance from preceeding locus (kb)	Start	End	Sequence organization T2T-CHM13v2.0	Sequence organization GRCh38.p14	Length 61 repeat (bp) CHM13v2.0 | GRCh38.p14	Length 29 repeat (bp) CHM13v2.0 | GRCh38.p14	Length 37 repeat (bp) CHM13v2.0 | GRCh38.p14
	1.1	127775694	127776462	Yes		NF	NF	K	NF	/ | /	120 | /	229 | /
	1.2	142398456	142399774	No	14622	143326728	143327669	P	P	/ | /	1056 | 679	185 | 185
	1.3	142496767	142497452	Yes	96.993	143424656	143425341	K	K	/ | /	32 | 32	229 | 229
	1.4	143252641	143254321	No	755.189	144152108	144153242	P	P	/ | /	1418 | 872	184 | 184
	1.5	143351259	143351944	Yes	96.938	144250269	144250954	K	K	/ | /	32 | 32	229 | 229
	1.6	143815142	143815827	Yes	463.198	144715422	144716107	K	K	/ | /	32 | 32	229 | 229
	1.7	143912838	143914148	No	97.011	144813145	144814455	P	P	/ | /	1048 | 1048	185 | 185
	2.1	87354322	87355087	No		87348690	87349455	P	P	/ | /	501 | 501	187 | 187
	2.2	89437904	89438476	Yes	2082.82	NF	NF	K	NF	/ | /	38 | /	110 | /
	2.3	89592837	89593551	Yes	154.361	NF	NF	K	NF	/ | /	61 | /	229 | /
	2.4	89681951	89682471	No	88.4	NF	NF	P	NF	/ | /	256 | /	187 | /
	2.5	90058912	90059543	No	376.441	NF	NF	P	NF	/ | /	367 | /	187 | /
	2.6	90147808	90148522	Yes	88.265	89585594	89586308	K	K	/ | /	61 | 61	229 | 229
	2.7	90302964	90303536	Yes	154.442	NF	NF	K	NF	/ | /	38 | /	117 | /
	2.8	90800612	90801283	No	497.076	90245033	90245704	P	P	/ | /	407 | 407	187 | 187
	2.9	91752111	91752729	No	950.828	91571044	91571651	P	P	/ | /	350 | 339	187 | 187
	2.10	91849679	91850347	Yes	96.95	91659953	91660621	K	K	/ | /	61 | 61	183 | 183
	2.11	92184462	92185036	Yes	334.115	NF	NF	K	NF	/ | /	40 | /	110 | /
	2.12	94714260	94714961	No	2529.22	94208341	94209042	P	P	/ | /	541 | 541	83 | 83
	2.13	94981473	94982183	No	266.512	NF	NF	P	NF	/ | /	551 | /	83 | NF
	2.14*	114026640	114027332	Yes	19044.5	113601954	113602675	J	J	232 | 232	31 | 31	237 | 237
	2.15*	114028211	114029154	Yes	0.879	113603481	113604424	I	I	336 | 336	203 | 203	233 | 233
	2.16	132238252	132238884	Yes	18209.1	131802626	131803258	K	K	/ | /	38 | 38	183 | 183
	2.17	132248635	132249269	Yes	9.751	131813026	131813660	K	K	/ | /	43 | 43	167 | 167
	2.18	132788396	132789058	Yes	539.127	132352051	132352713	K	K	/ | /	54 | 54	184 | 184
	3.1	95749501	95750270	Yes		NF	NF	K	NF	/ | /	121 | /	229 | /
	4.1	49233613	49234381	Yes		49274782	49275550	K	K	/ | /	120 | 120	229 | 229
	4.2	49293955	49294723	Yes	59.574	49334711	49335479	K	K	/ | /	120 | 120	229 | 229
	7.1	249817	249950	No		149159	149292	S	S	/ | /	134 | 134	/ | /
	9.1	40122820	40123309	No		40108520	40109009	P	P	/ | /	38 | 38	228 | 228
	9.2	40565640	40566256	No	442.331	40584145	40584722	P	P	/ | /	457 | 418	83 | 83
	9.3	40801061	40801838	Yes	234.805	NF	NF	K	NF	/ | /	120 | /	233 | /
	9.4	41937636	41938125	No	1135.8	41356502	41356991	P	P	/ | /	38 | 38	228 | 228
	9.5	42020133	42020883	Yes	82.008	NF	NF	K	NF	/ | /	93 | /	228 | /
	9.6	42710358	42710813	No	689.475	NF	NF	P	NF	/ | /	296 | /	83 | /
	9.7	44188728	44189281	Yes	1477.91	42635955	42636508	M	M	/ | /	/ | /	129 | 129
	9.8	44210480	44211086	Yes	21.199	42657700	42658306	M	M	/ | /	/ | /	181 | 181
	9.9	44794955	44795569	No	583.869	NF	NF	P	NF	/ | /	455 | /	83 | /
	9.10	47778205	47778958	Yes	2982.64	NF	NF	K	NF	/ | /	96 | /	233 | /
	9.11	47853663	47854152	No	74.705	NF	NF	P	NF	/ | /	38 | /	228 | /
	9.12	76972228	76973352	Yes	29118.1	NF	NF	K	NF	/ | /	468 | /	233 | /
	9.13	77579868	77580401	No	606.516	NF	NF	P	NF	/ | /	38 | /	83 | /
	9.14	78037229	78037718	No	456.828	NF	NF	P	NF	/ | /	38 | /	228 | /
	9.15	79965827	79966430	No	1928.11	63385106	63385689	P	P	/ | /	451 | 431	83 | 83
	9.16	80192708	80193471	Yes	226.278	NF	NF	K	NF	/ | /	87 | /	253 | /
	9.17	80342838	80343666	Yes	149.367	NF	NF	K	NF	/ | /	171 | /	233 | /
	9.18	150391540	150392907	No	70047.9	138126252	138127495	N	N	905 | 781	/ | /	45 | 45
	10.1	38675759	38676328	Yes		38615463	38615829	K	N	/ | /	35 | /	110 | /
	11.1	230107	230986	No		189419	190298	O	O	600 / 600	61 | /61	/ | /
	13.1	9404669	9405419	Yes		NF	NF	K	NF	/ | /	98 / |	229 | /
	13.2	10451737	10452476	Yes	1046.32	NF	NF	K	NF	/ | /	91 | /	229 | /
	13.3	12721279	12721768	No	2268.8	NF	NF	P	NF	/ | /	38 |	228 | /
	13.4	12800052	12800818	Yes	78.284	NF	NF	K	NF	/ | /	112 / |	230 | /
	14.1	1658753	1659522	Yes		NF	NF	K	NF	/ | /	121 | /	229 | /
	14.2	2875945	2876656	Yes	1216.42	NF	NF	K	NF	/ | /	59 | /	229 | /
	14.3	4020642	4021439	Yes	1143.99	NF	NF	K	NF	/ | /	149 | /	229 | /
	14.4	5824829	5825655	Yes	1803.39	NF	NF	K	NF	/ | /	178 | /	229 | /
	14.5	6601009	6601780	Yes	775.354	NF	NF	K	NF	/ | /	117 | /	230 | /
	14.6	6678861	6679350	No	77.081	NF	NF	P	NF	/ | /	38 | /	228 | /
	14.7	8548120	8548553	No	1868.77	NF	NF	P	NF	/ | /	274 | /	83 | /
	14.8	13085868	13086578	Yes	4537.31	18582480	18583190	K	K	/ | /	74 | 74	226 | 226
	15.1	169722	170429	Yes		NF	NF	K	NF	/ | /	62 | /	226 | /
	15.2	1870136	1870933	Yes	1699.71	NF	NF	K	NF	/ | /	149 | /	229 | /
	15.3	4764142	4764892	Yes	2893.21	NF	NF	K	NF	/ | /	97 | /	229 | /
	15.4	16572556	16573259	Yes	11807.7	NF	NF	K	NF	/ | /	92 | /	187 | /
	15.5	18056287	18057048	No	1483.03	20147761	20148412	P	P	/ | /	550 | 430	141 | 141
	15.6	18191200	18191496	No	134.152	20282670	20282966	P	P	/ | /	36 | 36	236 | 236
	15.7	19361826	19362121	No	1170.33	NF	NF	P	NF	/ | /	36 | /	235 | /
	15.8	19496479	19497449	No	134.358	2737150	2739401	P	P	/ | /	748 | 1329	145 | 145
	16.1	32877757	32878638	Yes		32461821	32462664	K	K	/ | /	38 | 38	110 | 110
	16.2	33748161	33748452	No	869.523	NF	NF	P	NF	/ | /	37 | /	232 | /
	16.3	33883781	33884172	No	135.329	NF	NF	P	NF	/ | /	128 | /	186 | /
	16.4	34596666	34597547	Yes	712.494	NF	NF	K	NF	/ | /	38 | /	110 | /
	16.5	34884067	34884190	No	286.52	NF	NF	R	NF	/ | /	/ | /	101 | /
	16.6	35143648	35143939	No	259.458	33571459	33571750	P	P	/ | /	37 | 37	232 | 232
	16.7	35279374	35279772	No	135.435	33707206	33707604	P	P	/ | /	134 | 134	187 | 187
	17.1	39411	40278	No		133884	134763	O	O	600 | 600	109 | 109	/ | /
	18.1	56093	56945	Yes		NF	NF	L	NF	/ | /	557 | /	191 | /
	18.2	110189	111001	Yes	53.244	NF	NF	L	NF	/ | /	615 | /	191 | /
	18.3	164130	164895	Yes	53.129	NF	NF	L	NF	/ | /	470 | /	191 | /
	18.4	250207	251346	No	85.312	96417	97556	Q	Q	836 | 836	/ | /	50 | 50
	18.5	15039194	15039805	Yes	14787.8	14878930	14879541	M	M	/ | /	/ | /	187 | 187
	18.6	15146214	15146829	Yes	106.409	14984939	14985554	K	K	/ | /	16 | 16	174 | 174
	19.1	197255	198682	Yes		246003	247430	H	H	593 | 593	54 | 54	232 | 232
	20.1	71193	72295	Yes		NF	NF	H	NF	301 | /	56 | /	237 | /
	20.2	30056099	30056761	Yes	29983.8	30584824	30585486	K	K	/ | /	54 | 54	184 | 184
	20.3	30319021	30319724	Yes	262.26	NF	NF	K	NF	/ | /	50 | /	229 | /
	20.4	66106173	66107262	Yes	35786.4	64285610	64286699	H	H	666 | 666	54 | 54	80 | 80
	21.1	231948	232655	Yes		NF	NF	K	NF	/ | /	62 | /	226 | /
	21.2	2338660	2339457	Yes	2106.01	8815392	8816189	K	K	/ | /	149 | 149	229 | 229
	21.3	5667310	5668124	Yes	3327.85	9043063	9043878	K	K	/ | /	165 | 166	229 | 229
	21.4	6549715	6550483	Yes	881.591	NF	NF	K	NF	/ | /	120 | /	229 | /
	21.5	7622181	7622978	Yes	1071.7	NF	NF	K	NF	/ | /	149 | /	229 | /
	21.6	9734777	9735257	No	2111.8	10121407	10121887	P	P	/ | /	34 | 34	228 | 228
	21.7	9813634	9814435	Yes	78.377	NF	NF	K	NF	/ | /	147 | /	229 | /
	21.8	11704152	11704812	Yes	1889.72	13359815	13360475	M	M	/ | /	/ | /	236 | 236
	22.1	230155	230862	Yes		NF	NF	K	NF	/ | /	62 | /	226 | /
	22.2	3840371	3841139	Yes	3609.51	NF	NF	K	NF	/ | /	120 | /	229 | /
	22.3	5775658	5776473	Yes	1934.52	NF	NF	K	NF	/ | /	166 | /	229 | /
	22.4	7555757	7556525	Yes	1779.28	NF	NF	K	NF	/ | /	120 | /	229 | /
	22.5	9807303	9808081	Yes	2250.78	11825124	11825920	K	K	/ | /	130 | 148	229 | 229
	22.6	10654942	10655768	Yes	846.861	12166457	12167225	K	K	/ | /	178 | 120	229 | 229
	22.7	11353794	11354193	No	698.026	NF	NF	P	NF	/ | /	240 | /	83 | /
	22.8	16083551	16084264	Yes	4729.36	15509538	15510251	K	K	/ | /	77 | 77	233 | 233
	22.9	17079147	17079718	Yes	994.883	16403329	16403900	K	K	/ | /	37 | 37	110 | 110
	22.10	22711260	22711899	No	5631.54	22297741	22298171	P	P	/ | /	375 | 211	187 | 141
		NF	Not found
		*Promoters flanking the ITS at the fusion site at the 2q14 locus
