# Supplementary material
Source: HighWire-hosted journal article supplement (doi:10.1101/rna.080790.125)
Supplement: Supplemental_Table_S4.xlsx [file Supplemental_Table_S4.xlsx]

## Sheet: Supplemental Table S4
	Supplemental Table S4. Genes adjacent to intrachromosomal TERRA promoters.
	Locus identification (Chr number.locus name)	Gene name	Annotation	Gene type	Gene description	Gene orientation compared to promoter
	1.2	LOC105371172	RefSeq predicted	Non-coding RNA	Uncharacterized	Forward
		LOC105371175	RefSeq predicted	Non-coding RNA	Uncharacterized	Reverse
	1.3	LOC107985200	RefSeq predicted	Non-coding RNA	Uncharacterized	Reverse
	1.4	LOC128966575	RefSeq predicted	Non-coding RNA	Uncharacterized	Forward
		LOC124905725	RefSeq predicted	Non-coding RNA	Uncharacterized	Reverse
	1.5	LSP1P5	RefSeq curated	Pseudogene	/	Reverse
	1.6	LINC02802	RefSeq predicted	Non-coding RNA	Long intergenic non-protein coding coding RNA 2802	Reverse
	1.7	LOC105371207	RefSeq predicted	Non-coding RNA	Uncharacterized	Forward
		LOC105371206	RefSeq predicted	Protein-coding	Uncharacterized	Reverse
	2.1	LOC105377635	RefSeq predicted	Non-coding RNA	Uncharacterized	Forward
		AC068279.2	CAT-Liftoff	Non-coding RNA	Long non-coding RNA	Reverse
	2.3	LOC107985911	RefSeq curated	Pseudogene	Lymphocyte specific protein 1 pseudogene	Reverse
	2.4	LOC124906034	RefSeq predicted	Non-coding RNA	Uncharacterized	Forward
		LOC124906033	RefSeq predicted	Non-coding RNA	Uncharacterized	Reverse
	2.5	LOC124906037	RefSeq predicted	Non-coding RNA	Uncharacterized	Reverse
	2.6	LOC124906039	RefSeq predicted	Protein-coding	Lymphocyte-specific protein 1-like	Reverse
	2.8	LOC124906040	RefSeq predicted	Non-coding RNA	Uncharacterized	Forward
	2.10	LSP1P4	RefSeq predicted	Pseudogene	LSP1 pseudogene 4	Reverse
	2.12	LOC124906043	RefSeq predicted	Non-coding RNA	Uncharacterized	Forward
		BMS1P23	RefSeq curated	Pseudogene	BMS1 pseudogene 23	Reverse
	2.13	LOC124905943	RefSeq predicted	Protein-coding	Lysine-rich arabinogalactan protein 19-like	Forward
		AC026273.1	CAT-Liftoff	Pseudogene	/	Reverse
	2.15	DDX11L2	RefSeq curated	Pseudogene	DEAD/H-box helicase 11 like 2	Forward
	2.18	FAM201B	RefSeq curated	Non-coding RNA	/	Reverse
	9.2	BMS1P14	RefSeq curated	Pseudogene	BMS1 pseudogene 14	Reverse
	9.3	PTGER4P2	CAT-Litfoff	Pseudogene	/	Forward
		AL512625.2	CAT-Liftoff	Non-coding RNA	/	Reverse
	9.5	AL845472.1	CAT-Liftoff	Non-coding RNA	/	Reverse
	9.6	LOC124906841	RefSeq predicted	Non-coding RNA	Uncharacterized	Forward
	9.10	AL845472.2	CAT-Liftoff	Non-coding RNA	/	Reverse
	9.12	FLJ43315	RefSeq curated	Pseudogene	Asparagine synthetase pseudogene	Forward
	9.13	LOC107984006	RefSeq predicted	Non-coding RNA	Uncharacterized	Forward
		LOC128966634	RefSeq predicted	Protein-coding	Ribosome biogenesis protein BMS1 homolog	Reverse
	9.14	LOC124906862	RefSeq predicted	Non-coding RNA	Uncharacterized	Reverse
	9.15	LOC124906870	RefSeq predicted	Non-coding RNA	Uncharacterized	Forward
		BMS1P10	CAT-Liftoff	Pseudogene	/	Reverse
	9.16	LOC124906875	RefSeq predicted	Protein-coding	Cyclin-dependent kinase 2-associated protein 2-like	Forward
		AL512625.2	CAT-Liftoff	Non-coding RNA	Long non-coding RNA	Reverse
	9.17	PTGER4P2-CDK2AP2P2	RefSeq curated	Pseudogene	Readthrough transcribed pseudogene	Forward
		LOC100132249	RefSeq curated	Non-coding RNA	Uncharacterized	Reverse
	13.4	AL845472.2	CAT-Liftoff	Non-coding RNA	/	Reverse
	14.3	LOC124907359	RefSeq predicted	Non-coding RNA	Uncharacterized	Forward
	14.5	PTGER4P2	CAT-Liftoff	Pseudogene	/	Forward
		AL845472.2	CAT-Liftoff	Non-coding RNA	/	Reverse
	15.5	AC087386.1	CAT-Liftoff	Non-coding RNA	Long non-coding RNA	Forward
	15.6	CHEK2P2	RefSeq curated	Pseudogene	CHEK2 pseudogene 2	Forward
	15.7	LOC124905504	RefSeq predicted	Non-coding RNA	Uncharacterized	Forward
	15.8	LOC124907496	RefSeq predicted	Non-coding RNA	Uncharacterized	Forward
	16.2	LOC101929031	RefSeq predicted	Non-coding RNA	Uncharacterized	Forward
	16.3	BMS1P8	CAT-Liftoff	Pseudogene	/	Reverse
	16.6	LOC102723890	RefSeq predicted	Non-coding RNA	Uncharacterized	Forward
	16.7	BMS1P8	CAT-Liftoff	Pseudogene	/	Reverse
	18.1	LINC02564	RefSeq curated	Non-coding RNA	Long intergenic non-protein coding coding RNA 2564	Reverse
	18.2	LINC02564	RefSeq curated	Non-coding RNA	Long intergenic non-protein coding coding RNA 2564	Reverse
	18.3	LINC02564	RefSeq curated	Non-coding RNA	Long intergenic non-protein coding coding RNA 2564	Reverse
	19.1	LOC107985295	RefSeq predicted	Non-coding RNA	Uncharacterized	Forward
	20.1	LOC128966666	RefSeq predicted	Pseudogene	60S ribosomal protein L23a-like	Forward
	20.3	PTGER4P2	CAT-Litfoff	Pseudogene	/	Forward
		LOC124908120	RefSeq predicted	Protein-coding	Uncharacterized	Reverse
	21.7	PTGER4P2	CAT-Litfoff	Pseudogene	/	Forward
		AL845472.2	CAT-Liftoff	Non-coding RNA	/	Reverse
	22.10	LOC105372952	RefSeq predicted	Non-coding RNA	Uncharacterized	Forward
		BMS1P20	RefSeq curated	Pseudogene	BMS1 pseudogene 20	Reverse
