# Supplementary material
Source: HighWire-hosted journal article supplement (doi:10.1101/rna.080790.125)
Supplement: Supplemental_Table_S5.docx [file Supplemental_Table_S5.docx]

**Supplemental Table S5. Primers used for Real Time qPCR experiments.**

| **Locus** | **Sequence (F, R)** | **Reference** |
| --- | --- | --- |
| 5q, 7p, 9q, 10q, 13q, 16q | CCGTTTGCTGCCCTGAATAA | (Nergadze et al. 2009) |
| TCTGACGCTGCACTTGAACC |
| 20p | CCCTGAATAATCAAGGTCACAGAG | This work |
| GCCTTGCCTTGGGAGAATCT |
| Xp | GCAAAGAGTGAAAGAACGAAGCTT | (Porro et al. 2010) |
| CCCTCTGAAAGTGGACCAATCA |
| 1.1 | CGCAGCCTCAGAAGACAAATG | This work |
| GAGGCAGTGCATTAGCATTACAGT |
| 1.3, 1.5, 1.6, 2.2, 2.3, 2.6, 2.7, 2.10, 2.16, 9.7, 13.4, 14.5, 20.2, 21.7, 22.9 | GCTCATGTAACAAGCACCTGTA | This work |
| CAATGTTGATTATTATGATCGCTGTC |
| 14.3 | CAGGGCCAGAGACCAGTTAG | This work |
| GGTGTCATGTCTGCATTAGGAAC |
| 22.1 | ATATGACACCCCCATTGCTT | This work |
| TCTCTGTCTTAGGACTGCATGG |
| 2.18 | GAGACCAGTTAGAGGGGTTCAA | This work |
| GGTGTGGATCTCGCACTG |
| 3.1, 14.1, 15.2, 21.2, 22.2, 22.5 | ACCCCCATTGCTCATGTAAC | This work |
| GGTTCGTTACTACGTTTGTACTATGC |
| 9.10 | GGTGAATAAAATCCTTCCTGTTTGT | This work |
| ATTCAGAGGGGCTTTTGGTT |
| chr4:8327260 | TACAGAGATGCCACCAGAAC | This work |
| AGAAAGTGCACGGGGCAGAA |
| chr6:976494 | CTGGCCACATCACTTTACTCTG | This work |
| CCTAACCTTGAGCTGGGTGC |
| chr8:37511889 | TCATTGTCTCCAGGCTGCT | This work |
| ATGCCAACATGTTTGTGGA |
| hB2M | GATGAGTATGCCTGCCGTGTG | (Kadl et al. 2002; Pattyn et al. 2003) |
| CAATCCAAATGCGGCATCT |

**REFERENCES**

Kadl A, Huber J, Gruber F, Bochkov VN, Binder BR, Leitinger N. 2002. Analysis of inflammatory gene induction by oxidized phospholipids in vivo by quantitative real-time RT-PCR in comparison with effects of LPS. *Vascul Pharmacol* **38**: 219–227.

Nergadze SG, Farnung BO, Wischnewski H, Khoriauli L, Vitelli V, Chawla R, Giulotto E, Azzalin CM. 2009. CpG-island promoters drive transcription of human telomeres. *RNA* **15**: 2186–2194.

Pattyn F, Speleman F, De Paepe A, Vandesompele J. 2003. RTPrimerDB: the real-time PCR primer and probe database. *Nucleic Acids Res* **31**: 122–123.

Porro A, Feuerhahn S, Reichenbach P, Lingner J. 2010. Molecular dissection of telomeric repeat-containing RNA biogenesis unveils the presence of distinct and multiple regulatory pathways. *Mol Cell Biol* **30**: 4808–4817.
