# Supplementary material
Source: HighWire-hosted journal article supplement (doi:10.1101/rna.080790.125)
Supplement: Supplemental_Table_S7.xlsx [file Supplemental_Table_S7.xlsx]

## Sheet: Table S7
Supplemental Table S7: Counts per million of reads overlapping ITSs and extending to the flanking regions in U2OS, HeLa and HEK293T
ITS coordinates	ITS length	U2OS CPM	HeLa CPM	HEK293T CPM	TERRA-like promoter
chr1:9530-9549	20	0.0	0.0	0.0	No
chr1:4682200-4682230	31	0.0	0.0	0.0	No
chr1:7267009-7267027	19	1.7	0.0	0.0	No
chr1:10983084-10983162	79	0.0	0.0	0.0	No
chr1:12168907-12168947	41	0.0	4.4	1.4	No
chr1:18074555-18074682	128	0.0	0.0	0.0	No
chr1:19779903-19779919	17	0.0	0.0	0.0	No
chr1:25353482-25353502	21	0.0	0.0	0.7	No
chr1:28165944-28165963	20	0.0	0.0	0.7	No
chr1:30110807-30110828	22	0.0	0.0	0.0	No
chr1:31885375-31885402	28	10.1	2.9	11.9	No
chr1:41151352-41151395	44	0.0	0.0	0.0	No
chr1:41369832-41369853	22	11.8	0.5	0.0	No
chr1:56650482-56650524	43	0.0	0.0	0.0	No
chr1:73198402-73198422	21	0.0	0.0	0.0	No
chr1:77967529-77967564	36	0.0	0.0	0.0	No
chr1:79208718-79208741	24	0.0	0.0	0.0	No
chr1:97826610-97826646	37	0.0	0.0	0.0	No
chr1:110114301-110114326	26	0.0	0.0	0.0	No
chr1:127776463-127776760	298	32.0	0.0	0.7	Yes
chr1:142497453-142497671	219	37.1	0.0	3.5	Yes
chr1:143351945-143352163	219	38.8	0.0	4.2	Yes
chr1:143814923-143815141	219	28.7	0.0	2.8	Yes
chr1:144626694-144626712	19	0.0	0.0	0.0	No
chr1:146724427-146724445	19	0.0	0.0	0.0	No
chr1:169324943-169324963	21	1.7	0.0	0.0	No
chr1:177863682-177863703	22	0.0	0.0	0.0	No
chr1:180091873-180091901	29	0.0	0.0	0.0	No
chr1:182034692-182034717	26	0.0	0.0	0.0	No
chr1:192570755-192570779	25	1.7	3.9	3.5	No
chr1:202383467-202383487	21	0.0	0.0	0.0	No
chr1:225653732-225653779	48	0.0	0.0	0.0	No
chr1:240486477-240486494	18	0.0	0.0	2.1	No
chr2:6848782-6848797	16	0.0	0.0	0.0	No
chr2:7375579-7375604	26	0.0	0.0	0.0	No
chr2:10269515-10269536	22	0.0	0.0	0.0	No
chr2:11038159-11038190	32	0.0	0.0	0.0	No
chr2:11725224-11725240	17	0.0	0.0	0.0	No
chr2:22202742-22202769	28	0.0	0.0	0.0	No
chr2:23087275-23087295	21	0.0	0.0	0.0	No
chr2:29419960-29419978	19	0.0	0.0	0.0	No
chr2:49836402-49836435	34	0.0	0.0	0.0	No
chr2:52943874-52943893	20	0.0	0.0	0.0	No
chr2:59580559-59580574	16	0.0	0.0	0.0	No
chr2:70469719-70469740	22	0.0	0.0	0.0	No
chr2:75081344-75081385	42	0.0	0.0	0.0	No
chr2:75538468-75538493	26	16.9	0.0	1.4	No
chr2:78217843-78217863	21	0.0	0.0	0.0	No
chr2:86917301-86917328	28	0.0	0.5	0.0	No
chr2:89437625-89437903	279	0.0	0.0	0.7	Yes
chr2:89592618-89592836	219	104.6	0.5	7.7	Yes
chr2:90148523-90148741	219	10.1	0.0	0.7	Yes
chr2:90303537-90303815	279	0.0	0.0	0.0	Yes
chr2:91850348-91850566	219	55.7	2.0	3.5	Yes
chr2:92185037-92185330	294	0.0	0.0	0.7	Yes
chr2:102690949-102690969	21	0.0	0.0	0.0	No
chr2:114027333-114028210	878	200.7	106.7	30.1	Yes
chr2:114044466-114044485	20	15.2	4.4	18.2	No
chr2:114049247-114049494	248	170.3	81.6	144.1	No
chr2:121904042-121904072	31	8.4	2.5	2.8	No
chr2:122594745-122594799	55	0.0	0.0	0.0	No
chr2:124568256-124568279	24	0.0	0.0	0.0	No
chr2:129531049-129531067	19	0.0	0.0	0.0	No
chr2:132238229-132238254	26	0.0	0.0	0.0	No
chr2:132238885-132239143	259	1.7	0.0	2.8	Yes
chr2:132248365-132248634	270	1.7	4.9	0.0	Yes
chr2:132788125-132788395	271	0.0	0.0	0.0	Yes
chr2:145206918-145206939	22	0.0	0.0	0.0	No
chr2:181765935-181766001	67	0.0	0.0	0.0	No
chr2:209448712-209448731	20	0.0	0.0	0.0	No
chr2:219248682-219248701	20	0.0	0.0	0.7	No
chr2:220188378-220188414	37	0.0	0.0	0.0	No
chr2:222548470-222548560	91	0.0	0.0	0.0	No
chr2:228317923-228317961	39	0.0	0.0	0.0	No
chr2:229597816-229597844	29	0.0	0.0	0.0	No
chr2:231729967-231729996	30	5.1	0.5	4.2	No
chr2:232889805-232889841	37	0.0	0.0	0.0	No
chr2:232941955-232941983	29	0.0	0.0	0.0	No
chr2:234746889-234746908	20	0.0	0.0	0.0	No
chr2:234796696-234796718	23	0.0	0.0	0.0	No
chr2:239980101-239980126	26	0.0	0.0	0.0	No
chr2:240714327-240714361	35	0.0	0.0	0.0	No
chr2:241107588-241108443	856	1.7	0.0	0.7	No
chr2:242679165-242679186	22	0.0	0.0	0.0	No
chr3:31475826-31475844	19	0.0	0.0	0.0	No
chr3:35965728-35965747	20	0.0	0.0	0.0	No
chr3:44358281-44358304	24	0.0	0.0	0.0	No
chr3:48374302-48374320	19	0.0	0.0	0.0	No
chr3:50800703-50800758	56	0.0	0.0	0.0	No
chr3:57065886-57065907	22	0.0	1.0	0.0	No
chr3:59462079-59462103	25	0.0	0.0	0.0	No
chr3:72667420-72667439	20	0.0	0.0	0.0	No
chr3:95749198-95749500	303	91.1	2.0	121.7	Yes
chr3:109504935-109504954	20	0.0	0.0	0.0	No
chr3:116123754-116123777	24	0.0	0.0	0.0	No
chr3:121626233-121626250	18	0.0	0.0	0.7	No
chr3:126155381-126155406	26	0.0	0.0	0.0	No
chr3:126970098-126970119	22	0.0	0.0	0.0	No
chr3:137191727-137191746	20	0.0	0.0	0.0	No
chr3:137422927-137422963	37	0.0	0.0	0.0	No
chr3:147375259-147375274	16	0.0	0.0	0.0	No
chr3:162468838-162468878	41	0.0	0.0	0.0	No
chr3:184626796-184626835	40	0.0	0.0	0.0	No
chr3:200903916-200905755	1840	27.0	89.0	178.4	No
chr4:22554-22751	198	1.7	0.0	1.4	No
chr4:704583-705050	468	8.4	4.9	44.8	No
chr4:6398388-6398426	39	0.0	0.0	0.7	No
chr4:6630876-6630897	22	0.0	0.0	0.0	No
chr4:8327260-8327309	50	0.0	0.0	0.0	No
chr4:14209533-14209553	21	0.0	0.0	0.0	No
chr4:29866919-29866934	16	0.0	0.0	0.0	No
chr4:47171881-47171911	31	0.0	0.0	0.0	No
chr4:49233322-49233612	291	87.7	0.5	22.4	Yes
chr4:49294724-49295014	291	72.5	1.5	19.6	Yes
chr4:60579147-60579168	22	32.0	2.9	0.7	No
chr4:72523369-72523389	21	0.0	0.0	0.0	No
chr4:87426910-87426931	22	0.0	0.0	0.0	No
chr4:88677414-88677430	17	0.0	0.0	0.0	No
chr4:104371160-104371176	17	10.1	0.0	1.4	No
chr4:110095532-110095555	24	0.0	0.0	0.0	No
chr4:120784464-120784480	17	0.0	0.0	0.0	No
chr4:193550045-193550397	353	0.0	0.0	0.0	No
chr4:193555463-193555482	20	3.4	2.5	0.7	No
chr5:40107-40374	268	1.7	0.0	0.7	No
chr5:40644-41260	617	129.9	3.9	14.0	No
chr5:1059775-1059955	181	1.7	1.0	0.7	No
chr5:2100698-2100892	195	0.0	0.0	0.0	No
chr5:2914364-2914425	62	0.0	0.0	0.0	No
chr5:16287408-16287464	57	5.1	0.0	0.0	No
chr5:17988924-17988954	31	0.0	0.0	0.0	No
chr5:27053796-27053816	21	0.0	0.0	0.0	No
chr5:40985345-40985373	29	0.0	4.4	4.9	No
chr5:68253724-68253742	19	0.0	0.0	0.0	No
chr5:68364963-68364993	31	0.0	0.0	0.0	No
chr5:82296570-82296592	23	0.0	0.0	0.0	No
chr5:84004891-84004931	41	0.0	0.0	0.7	No
chr5:89813956-89813996	41	0.0	0.0	0.0	No
chr5:104592534-104592553	20	6.7	1.0	3.5	No
chr5:113022370-113022387	18	0.0	0.0	0.0	No
chr5:120367604-120367619	16	0.0	0.0	0.0	No
chr5:152378620-152378652	33	0.0	0.0	0.7	No
chr5:157553867-157553885	19	0.0	0.0	0.0	No
chr5:167475704-167475729	26	0.0	0.0	0.0	No
chr5:169448883-169448906	24	0.0	0.0	0.0	No
chr5:173322115-173322135	21	0.0	0.5	0.0	No
chr5:182028951-182028970	20	0.0	0.0	0.0	No
chr6:976494-976537	44	0.0	0.0	0.7	No
chr6:2067724-2067743	20	0.0	0.0	0.0	No
chr6:2499114-2499135	22	13.5	10.8	4.9	No
chr6:6795400-6795438	39	0.0	0.0	0.0	No
chr6:7787116-7787136	21	0.0	0.0	0.0	No
chr6:11935279-11935312	34	6.7	4.9	7.0	No
chr6:38769385-38769465	81	0.0	0.0	0.0	No
chr6:55037904-55037929	26	0.0	0.0	0.0	No
chr6:63230632-63230658	27	0.0	0.0	0.0	No
chr6:77898553-77898569	17	0.0	0.0	0.0	No
chr6:83143346-83143361	16	0.0	0.0	0.0	No
chr6:113286038-113286059	22	0.0	0.0	5.6	No
chr6:114984295-114984315	21	0.0	0.0	0.0	No
chr6:116935041-116935070	30	0.0	0.0	0.0	No
chr6:118184607-118184626	20	0.0	0.0	0.0	No
chr6:135408752-135408782	31	0.0	0.0	0.0	No
chr6:136742634-136742678	45	0.0	0.0	0.0	No
chr6:158225176-158225196	21	3.4	1.0	2.1	No
chr6:165507550-165507572	23	0.0	0.0	0.0	No
chr6:167577299-167577321	23	0.0	0.0	0.0	No
chr6:169109015-169109037	23	0.0	0.0	0.0	No
chr6:169150610-169150642	33	0.0	0.0	0.0	No
chr6:171548712-171548731	20	0.0	0.0	0.0	No
chr6:172115770-172115791	22	0.0	0.0	0.0	No
chr7:18504-18525	22	0.0	0.0	0.0	No
chr7:113892-114667	776	10.1	19.7	41.3	No
chr7:274521-274550	30	0.0	0.0	0.0	No
chr7:1167839-1167931	93	99.5	15.7	74.2	No
chr7:1288212-1288252	41	0.0	0.0	0.0	No
chr7:1868825-1869032	208	0.0	0.0	0.0	No
chr7:31498863-31498892	30	0.0	0.0	0.0	No
chr7:41140241-41140262	22	0.0	0.0	0.0	No
chr7:41282019-41282045	27	0.0	0.0	0.0	No
chr7:43047059-43047075	17	6.7	0.5	2.1	No
chr7:44255932-44255965	34	0.0	0.0	0.0	No
chr7:67294074-67294096	23	0.0	0.0	0.0	No
chr7:68572585-68572711	127	0.0	1.0	0.7	No
chr7:73638481-73638517	37	0.0	0.0	0.0	No
chr7:86857263-86857320	58	0.0	0.0	0.0	No
chr7:113457234-113457253	20	3.4	0.0	0.7	No
chr7:154071116-154071188	73	0.0	0.0	0.0	No
chr7:156953285-156953334	50	3.4	130.8	268.7	No
chr7:157373329-157373356	28	0.0	0.0	0.0	No
chr7:160523216-160523381	166	0.0	0.0	0.0	No
chr8:16217-16402	186	28.7	23.6	37.8	No
chr8:17214-17391	178	47.2	32.0	67.9	No
chr8:360158-360192	35	0.0	0.0	0.0	No
chr8:27266408-27266436	29	0.0	0.0	0.0	No
chr8:35883954-35883992	39	0.0	0.0	0.0	No
chr8:37511889-37511916	28	0.0	0.0	0.0	No
chr8:53413764-53413780	17	0.0	0.0	0.0	No
chr8:66327368-66327398	31	0.0	0.0	0.0	No
chr8:76418952-76418980	29	0.0	0.0	0.0	No
chr8:85293068-85293092	25	0.0	0.0	0.0	No
chr8:97924326-97924365	40	0.0	0.0	0.0	No
chr8:103052628-103052652	25	0.0	0.0	0.0	No
chr8:113300314-113300342	29	0.0	0.0	0.0	No
chr8:113834773-113834798	26	0.0	0.0	0.0	No
chr8:115973232-115973260	29	5.1	0.0	0.0	No
chr8:123078121-123078136	16	0.0	0.0	0.0	No
chr8:125937604-125937644	41	0.0	0.0	0.0	No
chr8:130209965-130209984	20	0.0	0.0	0.0	No
chr8:143422594-143422616	23	0.0	0.0	0.0	No
chr8:144331826-144331861	36	0.0	0.0	0.0	No
chr9:2827844-2827880	37	0.0	0.0	0.0	No
chr9:13967693-13967717	25	0.0	0.0	0.0	No
chr9:30494589-30494611	23	0.0	0.0	0.0	No
chr9:34735284-34735308	25	10.1	1.0	0.7	No
chr9:34925808-34925830	23	0.0	0.0	0.0	No
chr9:38405954-38405973	20	0.0	0.0	0.0	No
chr9:40801839-40802084	246	27.0	11.8	41.3	Yes
chr9:42019874-42020132	259	10.1	10.3	16.8	Yes
chr9:44188465-44188727	263	426.7	2.5	14.7	Yes
chr9:44211087-44211335	249	954.5	4.4	11.9	Yes
chr9:47778959-47779217	259	11.8	1.5	7.0	Yes
chr9:48745171-48745205	35	0.0	0.0	0.0	No
chr9:76971956-76972227	272	99.5	0.0	0.0	Yes
chr9:80193472-80193717	246	8.4	9.8	54.6	Yes
chr9:80342592-80342837	246	33.7	6.9	58.8	Yes
chr9:81433154-81433231	78	0.0	0.0	0.0	No
chr9:119539493-119539544	52	0.0	0.0	0.0	No
chr9:122782972-122782992	21	0.0	0.0	0.0	No
chr9:133702224-133702241	18	1.7	0.0	0.0	No
chr9:134988984-134989003	20	0.0	0.0	0.0	No
chr9:140361357-140361408	52	0.0	0.0	0.0	No
chr9:142370087-142370188	102	0.0	7.4	0.7	No
chr9:145747271-145747289	19	0.0	0.0	0.0	No
chr9:146424574-146424607	34	0.0	0.0	0.0	No
chr9:149494104-149494119	16	0.0	0.0	0.0	No
chr9:150380447-150380471	25	0.0	0.0	0.0	No
chr9:150394480-150394619	140	0.0	0.0	0.7	No
chr9:150425122-150425458	337	1.7	47.2	459.7	No
chr9:150499557-150500303	747	3.4	27.5	76.3	No
chr9:150599398-150599419	22	0.0	1.0	0.7	No
chr10:57229-57561	333	16.9	32.4	32.2	No
chr10:2951871-2951889	19	0.0	0.0	0.0	No
chr10:3537953-3537984	32	0.0	0.0	0.0	No
chr10:3947965-3948154	190	0.0	0.0	0.0	No
chr10:4072970-4073128	159	0.0	0.0	0.0	No
chr10:4617326-4617346	21	0.0	0.0	0.0	No
chr10:8469778-8469896	119	0.0	0.0	0.0	No
chr10:16322714-16322736	23	0.0	0.0	0.0	No
chr10:25426160-25426183	24	0.0	0.0	0.0	No
chr10:26568834-26568857	24	0.0	0.0	0.0	No
chr10:28338091-28338107	17	0.0	0.0	0.0	No
chr10:38675472-38675758	287	0.0	0.0	0.0	Yes
chr10:44257652-44257672	21	0.0	0.0	0.0	No
chr10:46977607-46977626	20	0.0	0.0	0.0	No
chr10:47152233-47152258	26	0.0	0.0	0.0	No
chr10:47181567-47181736	170	1.7	0.0	0.0	No
chr10:47182152-47182182	31	0.0	0.0	0.0	No
chr10:48296377-48296515	139	1.7	0.5	0.0	No
chr10:51914463-51914484	22	1.7	0.0	5.6	No
chr10:53593167-53593189	23	0.0	0.0	0.0	No
chr10:77142201-77142225	25	0.0	0.0	0.0	No
chr10:79143404-79143430	27	0.0	0.0	0.0	No
chr10:79744490-79744541	52	0.0	0.0	0.0	No
chr10:80412362-80412388	27	0.0	0.0	0.0	No
chr10:81086067-81086103	37	0.0	1.5	0.0	No
chr10:118065291-118065311	21	0.0	0.0	0.0	No
chr10:125943561-125943582	22	3.4	0.0	0.7	No
chr10:134517881-134518926	1046	102.9	0.0	5.6	No
chr10:134732968-134733320	353	8.4	0.0	6.3	No
chr10:134738394-134738413	20	0.0	0.5	2.1	No
chr11:201435-202799	1365	5.1	7.9	16.1	No
chr11:232481-232703	223	3.4	0.0	2.8	No
chr11:1931630-1931661	32	0.0	0.0	0.0	No
chr11:2211803-2211831	29	0.0	0.0	0.0	No
chr11:6931606-6931626	21	0.0	0.0	0.0	No
chr11:9116543-9116558	16	0.0	0.0	0.7	No
chr11:10749997-10750029	33	0.0	0.0	0.0	No
chr11:18736506-18736522	17	0.0	0.0	0.0	No
chr11:25665966-25665989	24	0.0	0.0	0.0	No
chr11:33270751-33270771	21	3.4	6.9	8.4	No
chr11:55651275-55651291	17	0.0	0.0	0.0	No
chr11:57325753-57325779	27	0.0	0.0	0.0	No
chr11:57929979-57930084	106	0.0	0.0	0.0	No
chr11:63017480-63017535	56	0.0	0.0	0.0	No
chr11:69333628-69333655	28	0.0	0.0	0.0	No
chr11:70260628-70260643	16	0.0	0.0	0.0	No
chr11:80821567-80821716	150	3.4	0.0	0.0	No
chr11:84992427-84992449	23	0.0	0.0	0.0	No
chr11:87867737-87867760	24	0.0	0.0	0.0	No
chr11:107494225-107494243	19	0.0	0.0	0.0	No
chr11:114286004-114286141	138	0.0	0.0	2.1	No
chr11:124562260-124562296	37	0.0	0.0	0.0	No
chr11:129739224-129739255	32	0.0	0.0	0.0	No
chr12:101079-101113	35	0.0	0.0	0.0	No
chr12:15225319-15225342	24	11.8	0.0	0.0	No
chr12:15880817-15880842	26	1.7	0.0	1.4	No
chr12:22119098-22119132	35	0.0	0.0	0.0	No
chr12:26221772-26221787	16	0.0	0.0	0.0	No
chr12:70599108-70599124	17	0.0	0.5	0.0	No
chr12:77654799-77654821	23	0.0	0.0	0.0	No
chr12:88036666-88036688	23	0.0	0.5	0.7	No
chr12:98288151-98288178	28	0.0	0.0	0.0	No
chr12:106541453-106541499	47	0.0	0.0	0.0	No
chr12:107986277-107986300	24	0.0	0.0	0.0	No
chr12:110121902-110121919	18	5.1	1.0	6.3	No
chr12:112511444-112511491	48	0.0	0.0	0.0	No
chr12:121187418-121187475	58	0.0	0.0	0.0	No
chr12:124269590-124269786	197	3.4	0.0	0.7	No
chr12:124915748-124915768	21	38.8	12.3	14.7	No
chr12:125546381-125546399	19	0.0	0.0	0.0	No
chr12:126573768-126573841	74	0.0	0.0	0.0	No
chr12:127688017-127688037	21	0.0	0.0	0.0	No
chr12:132504959-132504981	23	1.7	0.5	0.0	No
chr12:133298420-133298734	315	0.0	0.0	0.0	No
chr13:9405420-9405724	305	48.9	2.5	0.7	Yes
chr13:10451446-10451736	291	10.1	0.0	0.0	Yes
chr13:12799788-12800051	264	15.2	0.0	0.7	Yes
chr13:26082488-26082507	20	0.0	0.0	0.0	No
chr13:34674031-34674060	30	1.7	0.0	0.7	No
chr13:38976911-38976927	17	0.0	0.0	0.0	No
chr13:80937494-80937524	31	0.0	0.0	0.0	No
chr13:89908205-89908250	46	0.0	0.0	0.0	No
chr13:93495973-93495999	27	0.0	0.0	0.0	No
chr13:94724664-94724684	21	0.0	0.0	0.0	No
chr13:107734891-107734909	19	0.0	0.0	0.0	No
chr13:109694733-109694767	35	0.0	0.0	2.1	No
chr13:110903701-110903741	41	0.0	0.0	0.0	No
chr13:111243031-111243228	198	0.0	0.0	0.0	No
chr13:112154164-112154289	126	30.4	2.9	4.2	No
chr13:113358259-113358277	19	0.0	0.0	0.0	No
chr13:113415113-113415133	21	0.0	0.0	0.0	No
chr13:113422683-113422713	31	0.0	0.0	0.0	No
chr14:1658456-1658752	297	10.1	17.7	60.2	Yes
chr14:2876657-2876961	305	182.1	2.0	5.6	Yes
chr14:4020351-4020641	291	0.0	0.0	0.0	Yes
chr14:5824518-5824828	311	1.7	0.0	0.0	Yes
chr14:6601781-6602046	266	18.6	0.0	0.0	Yes
chr14:9935744-9935762	19	0.0	0.0	0.0	No
chr14:13076135-13076464	330	0.0	0.0	0.0	No
chr14:13085667-13085867	201	21.9	0.0	0.0	Yes
chr14:43304666-43304690	25	0.0	0.0	0.0	No
chr14:64282373-64282389	17	0.0	0.0	0.0	No
chr14:72637640-72637667	28	0.0	0.0	0.0	No
chr14:91165765-91165780	16	0.0	0.5	0.0	No
chr14:93608609-93608641	33	0.0	0.5	0.0	No
chr14:94824521-94824593	73	0.0	0.0	0.0	No
chr14:98829660-98829681	22	0.0	0.0	0.0	No
chr14:98844653-98844675	23	0.0	0.0	0.0	No
chr14:101156320-101156341	22	0.0	0.0	0.0	No
chr15:22606-22797	192	1.7	0.0	0.0	No
chr15:170430-170712	283	1.7	0.0	0.7	Yes
chr15:1869832-1870135	304	30.4	1.5	76.3	Yes
chr15:4764893-4765197	305	42.2	0.5	1.4	Yes
chr15:16572291-16572555	265	8.4	0.5	0.0	Yes
chr15:18097305-18097326	22	0.0	0.0	0.0	No
chr15:19137734-19138312	579	0.0	0.5	0.7	No
chr15:19455884-19455905	22	0.0	0.0	0.0	No
chr15:26700911-26700930	20	0.0	0.0	0.7	No
chr15:39756969-39757008	40	0.0	1.0	0.0	No
chr15:63972578-63972595	18	0.0	0.0	2.1	No
chr15:68822909-68822933	25	0.0	0.0	0.0	No
chr15:78327068-78327098	31	0.0	0.0	0.0	No
chr15:81759271-81759291	21	0.0	0.0	0.0	No
chr16:12452-12829	378	20.2	0.0	87.5	No
chr16:68786-68801	16	0.0	0.0	0.0	No
chr16:744735-744756	22	0.0	0.0	0.7	No
chr16:10021194-10021210	17	0.0	0.0	0.0	No
chr16:10287821-10287851	31	0.0	0.0	0.0	No
chr16:13881197-13881230	34	0.0	0.0	0.0	No
chr16:14729296-14729312	17	0.0	0.0	0.0	No
chr16:26036534-26036597	64	0.0	0.0	0.0	No
chr16:28731219-28731235	17	0.0	0.0	0.0	No
chr16:28945239-28945255	17	0.0	0.0	0.0	No
chr16:29059239-29059255	17	0.0	0.0	0.0	No
chr16:29339727-29339743	17	0.0	0.0	0.0	No
chr16:29533670-29533695	26	0.0	0.0	0.0	No
chr16:29759527-29759543	17	0.0	0.0	0.0	No
chr16:30501638-30501654	17	0.0	0.0	0.0	No
chr16:30603605-30603621	17	0.0	1.0	0.0	No
chr16:32878639-32878925	287	3.4	0.0	0.0	Yes
chr16:34596385-34596665	281	1.7	0.0	0.0	Yes
chr16:62521415-62521435	21	0.0	0.0	0.0	No
chr16:71036693-71036738	46	0.0	0.0	0.0	No
chr16:81380980-81381020	41	86.0	15.7	29.4	No
chr16:82173235-82173289	55	0.0	0.0	0.0	No
chr16:82197974-82198004	31	0.0	0.0	0.0	No
chr16:87986943-87987029	87	6.7	0.0	0.0	No
chr16:93595960-93596549	590	3.4	10.8	4.2	No
chr16:94292682-94292707	26	0.0	0.0	0.0	No
chr16:94624978-94624993	16	0.0	0.0	3.5	No
chr16:94950581-94950618	38	0.0	0.0	0.0	No
chr16:96209774-96210513	740	0.0	8.8	19.6	No
chr16:96312743-96312762	20	5.1	2.0	4.9	No
chr17:41785-41978	194	0.0	0.0	1.4	No
chr17:47125-47193	69	0.0	0.0	0.0	No
chr17:11318738-11318760	23	0.0	0.0	0.0	No
chr17:12380049-12380072	24	0.0	0.0	0.0	No
chr17:31249446-31249464	19	0.0	0.0	0.0	No
chr17:32006338-32006358	21	0.0	0.0	0.7	No
chr17:37518642-37518664	23	0.0	0.0	0.0	No
chr17:40560695-40560719	25	1.7	0.0	0.7	No
chr17:48566425-48566450	26	1.7	0.0	2.1	No
chr17:49344282-49344369	88	5.1	0.0	0.0	No
chr17:79366708-79366837	130	0.0	0.0	0.0	No
chr17:80960483-80960503	21	1.7	0.0	0.0	No
chr17:84256166-84256187	22	0.0	0.0	0.0	No
chr17:84256320-84256339	20	0.0	0.0	0.0	No
chr18:55417-56092	676	18.6	0.0	9.8	Yes
chr18:109434-110091	658	23.6	0.0	7.7	Yes
chr18:163479-164129	651	27.0	0.5	4.2	Yes
chr18:217401-217986	586	0.0	6.4	37.1	No
chr18:248304-248481	178	1.7	0.0	0.7	No
chr18:252542-252583	42	0.0	0.0	0.0	No
chr18:254032-254053	22	1.7	0.0	0.0	No
chr18:258983-259460	478	8.4	1.5	0.7	No
chr18:15039806-15040082	277	0.0	0.0	0.0	Yes
chr18:15145918-15146213	296	6.7	0.0	0.7	Yes
chr18:64180619-64180643	25	0.0	0.0	0.0	No
chr18:68377701-68377723	23	0.0	0.0	0.0	No
chr18:76621036-76621348	313	222.6	1.0	198.0	No
chr18:77339501-77339523	23	0.0	0.5	0.0	No
chr18:77984747-77984767	21	0.0	0.0	0.0	No
chr18:80534730-80535232	503	0.0	0.0	0.0	No
chr19:196785-197254	470	38.8	2.9	17.5	Yes
chr19:209296-209315	20	0.0	0.5	0.0	No
chr19:2319074-2319158	85	1.7	1.5	4.2	No
chr19:3128871-3128892	22	0.0	0.0	0.0	No
chr19:7659057-7659078	22	0.0	1.0	0.0	No
chr19:7868325-7868348	24	0.0	0.0	0.0	No
chr19:16789820-16789865	46	30.4	16.2	32.2	No
chr19:17690057-17690086	30	0.0	0.0	0.0	No
chr19:22144841-22144878	38	0.0	0.0	0.0	No
chr19:35600513-35600535	23	11.8	2.9	3.5	No
chr19:40440253-40440279	27	1.7	0.0	1.4	No
chr19:41244270-41244285	16	0.0	0.0	0.0	No
chr19:55812058-55812082	25	13.5	2.9	17.5	No
chr19:60925788-60925807	20	0.0	0.0	0.0	No
chr19:60986337-60986362	26	0.0	0.0	0.7	No
chr19:61678613-61678637	25	8.4	2.5	2.8	No
chr19:61684074-61684222	149	124.8	39.3	81.9	No
chr19:61688970-61688989	20	0.0	2.5	6.3	No
chr20:17700-17721	22	3.4	0.5	2.8	No
chr20:70771-71192	422	796.0	7.9	1024.3	Yes
chr20:3171414-3171440	27	0.0	1.0	0.7	No
chr20:10234396-10234429	34	0.0	0.0	0.0	No
chr20:17416768-17416787	20	0.0	0.0	0.0	No
chr20:19789320-19789345	26	0.0	0.0	0.0	No
chr20:30055828-30056098	271	3.4	0.5	0.0	Yes
chr20:30318763-30319020	258	0.0	0.0	0.0	Yes
chr20:36186607-36186630	24	6.7	1.5	4.2	No
chr20:47049127-47049339	213	32.0	2.5	4.9	No
chr20:51908145-51908162	18	1.7	0.0	0.0	No
chr20:65959081-65959107	27	0.0	0.0	0.0	No
chr20:66098157-66098177	21	0.0	0.0	0.0	No
chr20:66107263-66108099	837	62.4	4.4	37.8	Yes
chr21:19546-19737	192	1.7	0.0	0.0	No
chr21:232656-232935	280	1.7	0.0	1.4	Yes
chr21:2338356-2338659	304	3.4	0.0	4.9	Yes
chr21:5668125-5668429	305	107.9	4.4	21.0	Yes
chr21:6550484-6550751	268	0.0	0.0	0.0	Yes
chr21:7621870-7622180	311	33.7	0.0	1.4	Yes
chr21:9813383-9813633	251	11.8	0.0	0.0	Yes
chr21:11703856-11704151	296	0.0	0.0	0.0	Yes
chr21:12898218-12898240	23	0.0	0.0	0.0	No
chr21:20128727-20128761	35	0.0	0.0	0.0	No
chr21:33095424-33095501	78	0.0	0.0	0.0	No
chr21:36219331-36219361	31	0.0	0.0	0.0	No
chr21:36450530-36450548	19	0.0	0.0	0.0	No
chr21:40840751-40840768	18	0.0	0.0	0.0	No
chr21:42792397-42792471	75	3.4	0.0	0.0	No
chr21:42821186-42821438	253	6.7	0.0	0.7	No
chr21:45069634-45069653	20	0.0	1.0	0.0	No
chr22:21111-21302	192	3.4	0.0	0.7	No
chr22:230863-231153	291	0.0	0.0	0.0	Yes
chr22:3840067-3840370	304	38.8	0.0	5.6	Yes
chr22:5776474-5776778	305	598.7	9.8	14.0	Yes
chr22:7555466-7555756	291	5.1	0.0	1.4	Yes
chr22:9808082-9808384	303	11.8	1.0	5.6	Yes
chr22:10654631-10654941	311	28.7	0.0	0.7	Yes
chr22:12633359-12633377	19	0.0	0.0	0.0	No
chr22:16073811-16074147	337	0.0	0.0	0.0	No
chr22:16083350-16083550	201	10.1	0.0	0.0	Yes
chr22:17078848-17079146	299	1.7	0.0	0.0	Yes
chr22:17079717-17079745	29	1.7	0.0	0.0	No
chr22:26708608-26708630	23	0.0	0.0	0.0	No
chr22:31580791-31580812	22	0.0	0.0	0.0	No
chr22:43346737-43346767	31	0.0	0.5	0.7	No
chr22:44130395-44130410	16	0.0	0.0	0.0	No
chr22:45110256-45110317	62	0.0	0.0	0.0	No
chr22:49776674-49776977	304	1.7	0.0	0.0	No
chr22:50708623-50708641	19	0.0	1.0	5.6	No
chr22:51299629-51299887	259	153.5	51.1	163.0	No
chr22:51304662-51304681	20	21.9	2.5	11.2	No
chrX:4584-4606	23	0.0	0.0	2.1	No
chrX:8349-8371	23	0.0	0.0	0.0	No
chrX:2011089-2011111	23	0.0	0.0	0.0	No
chrX:2987451-2987472	22	0.0	0.0	0.0	No
chrX:2989574-2989630	57	0.0	0.0	0.0	No
chrX:5008060-5008080	21	0.0	0.0	0.0	No
chrX:5663278-5663311	34	1.7	0.0	0.0	No
chrX:6418928-6418976	49	0.0	0.0	0.0	No
chrX:23982288-23982607	320	0.0	1.5	39.2	No
chrX:37766256-37766271	16	0.0	0.0	0.0	No
chrX:47901531-47901552	22	0.0	0.0	0.0	No
chrX:50277193-50277316	124	0.0	0.0	0.0	No
chrX:65956085-65956113	29	0.0	0.0	0.0	No
chrX:72982198-72982334	137	0.0	2.0	2.1	No
chrX:82009615-82009634	20	0.0	0.0	0.0	No
chrX:85672288-85672308	21	0.0	0.0	0.0	No
chrX:89481180-89481200	21	0.0	0.0	0.0	No
chrX:96593273-96593294	22	1.7	0.0	0.0	No
chrX:111463338-111463409	72	0.0	0.0	0.0	No
chrX:135940624-135940647	24	0.0	0.0	0.0	No
chrX:136062042-136062057	16	0.0	0.0	0.0	No
chrX:146270815-146270833	19	0.0	0.0	0.0	No
chrX:149730139-149730158	20	0.0	0.0	0.0	No
chrX:153601459-153601493	35	1.7	0.0	0.0	No
chrX:153715337-153715371	35	0.0	0.0	0.7	No
chrX:154179944-154179988	45	11.8	1.0	2.1	No
chrX:154208438-154208513	76	1.7	0.0	1.4	No
chrX:154208952-154209015	64	0.0	0.0	0.7	No
chrX:154247849-154248207	359	5.1	0.5	15.4	No
